# Supplementary material for: Phylogenomic analyses across land plants reveals motifs and coexpression patterns useful for functional prediction in the BAHD acyltransferase family
Source: Frontiers journal article supplement (doi:10.3389/fpls.2023.1067613), 2023-02-10
Supplement: Image_1.PDF [file Image_1.PDF]

Supplementary Figure 1

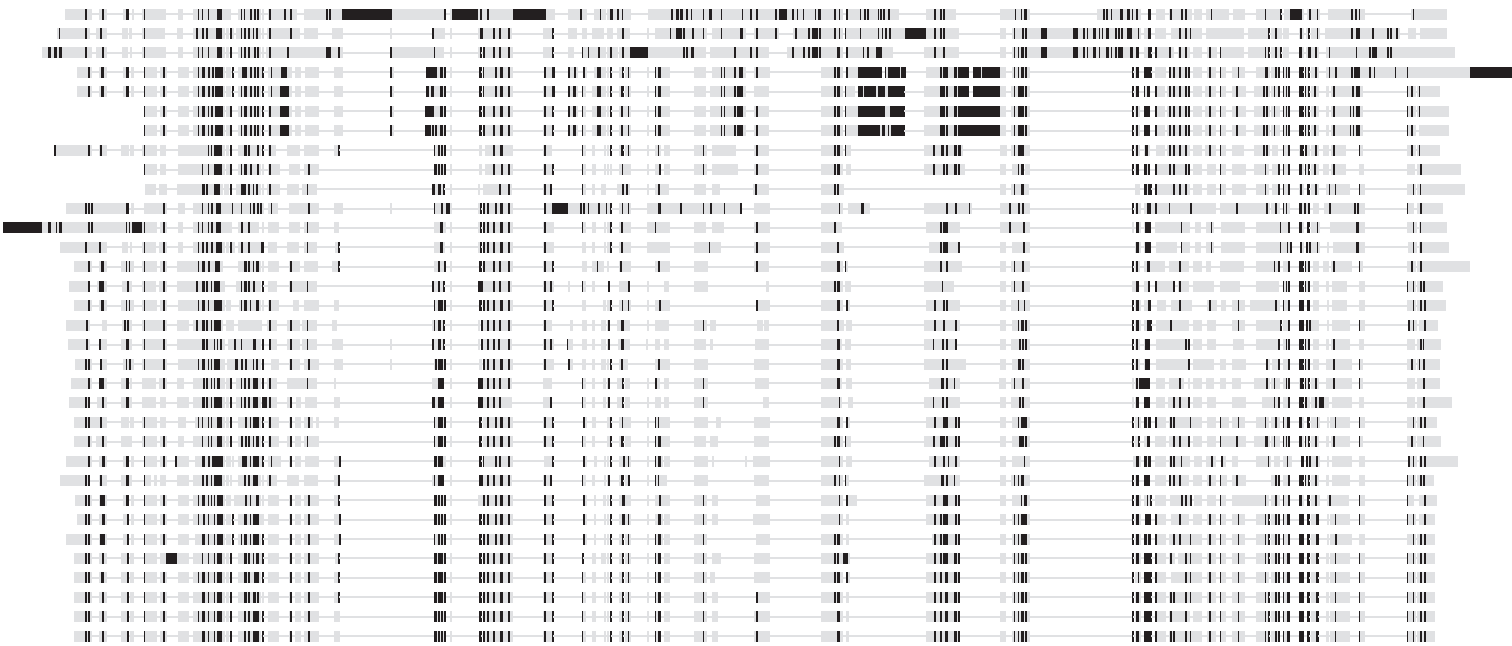

**Supplementary Figure 1. Alignment of selected algal BAHD sequences and 20 randomly selected plant BAHDs.** The alignment was performed using MUSCLE v3.8.425 and default parameters in Geneious v2022.1.1. Highlighted in black are agreements to the consensus sequence in at least 50% of the sequences. The percentage is relative to the number of sequences having a residue at a given alignment position.
