# Supplementary material for: Phylogenomic analyses across land plants reveals motifs and coexpression patterns useful for functional prediction in the BAHD acyltransferase family
Source: Frontiers journal article supplement (doi:10.3389/fpls.2023.1067613), 2023-02-10
Supplement: Image_2.PDF [file Image_2.PDF]

## Supplementary Figure 2

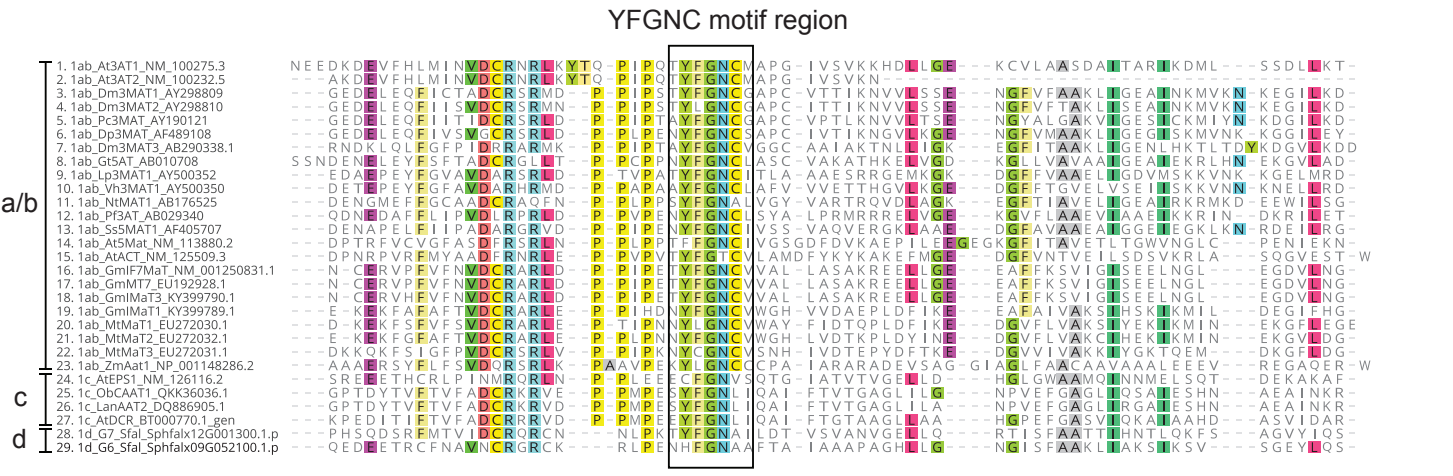

**Supplementary Figure 2. Alignment of the YFGNC motif region in clade 1.** Biochemically characterized sequences from clade 1 were aligned using MUSCLEv3.8.425 and using default parameters in Geneious v2022.1.1. The region of the YFGNC motif is highlighted using a black box. Colored residues are conserved in at least 50% of the sequences for each given residue position in the alignment.
