# Supplementary material for: Phylogenomic analyses across land plants reveals motifs and coexpression patterns useful for functional prediction in the BAHD acyltransferase family
Source: Front Plant Sci. 2023 Feb 10;14:1067613. doi: 10.3389/fpls.2023.1067613 (PMC9950517; doi:10.3389/fpls.2023.1067613)
Supplement: Supplementary File 1 — Excel file containing the results of the PCC vs Ks analyses. [file Table_1.xlsx]

## Sheet: Legend
	Supp. File 1: Results of Kolmogorov-Smirnov tests between pairs of bins of synonymous substitution rates between BAHD paralogs. These tests test whether Pearsons Correlation Coefficient (A,B) are significantly different. P-values were corrected for multiple testing using FDR correction. Cells with corrected p-value < 0.06 are highlighted.

## Sheet: A-KS.TEST_ara_pcc
bin_1	bin_2	D	p.value	p.adj
(0,0.2]	(0.6,0.8]	1	0.4	0.849231
(0,0.2]	(1, 1.2]	1	0.25	0.768955
(0,0.2]	(1.2,1.4]	1	0.0512821	0.673077
(0,0.2]	(1.4,1.6]	1	0.0190476	0.530303
(0,0.2]	(1.6,1.8]	1	0.013986	0.530303
(0,0.2]	(1.8,2]	1	0.0155039	0.530303
(0,0.2]	(2,2.2]	1	0.020202	0.530303
(0,0.2]	(2.2,2.4]	1	0.025641	0.538462
(0,0.2]	(2.4,2.6]	1	0.0384615	0.658107
(0,0.2]	(2.6,2.8]	0.970588	0.114286	0.734266
(0,0.2]	(2.8,3]	1	0.0606061	0.707071
(0,0.2]	(3,3.2]	1	0.0952381	0.734266
(0,0.2]	(3.4,3.6]	1	0.153846	0.734266
(0,0.2]	(3.6,3.8]	1	0.1	0.734266
(0,0.2]	(3.8,4]	1	0.4	0.849231
(0.6,0.8]	(1, 1.2]	0.25	0.987879	0.997378
(0.6,0.8]	(1.2,1.4]	0.407895	0.474493	0.873975
(0.6,0.8]	(1.4,1.6]	0.336538	0.681371	0.928841
(0.6,0.8]	(1.6,1.8]	0.369718	0.553946	0.912719
(0.6,0.8]	(2,2.2]	0.372449	0.552039	0.912719
(0.6,0.8]	(2.2,2.4]	0.399351	0.47199	0.873975
(0.6,0.8]	(2.6,2.8]	0.279412	0.867222	0.958509
(0.6,0.8]	(2.8,3]	0.4375	0.426721	0.861648
(0.6,0.8]	(3,3.2]	0.45	0.44777	0.873975
(0.6,0.8]	(3.4,3.6]	0.333333	0.859341	0.958509
(0.6,0.8]	(3.6,3.8]	0.381579	0.60926	0.928841
(0.6,0.8]	(3.8,4]	0.5	0.771429	0.94186
(1, 1.2]	(1.2,1.4]	0.424812	0.173534	0.759213
(1, 1.2]	(1.4,1.6]	0.368132	0.263642	0.768955
(1, 1.2]	(1.6,1.8]	0.355131	0.294432	0.791323
(1, 1.2]	(2,2.2]	0.387755	0.224397	0.768955
(1, 1.2]	(2.2,2.4]	0.402597	0.199348	0.768955
(1, 1.2]	(2.4,2.6]	0.361345	0.316529	0.791323
(1, 1.2]	(2.6,2.8]	0.273109	0.680366	0.928841
(1, 1.2]	(2.8,3]	0.464286	0.124243	0.734266
(1, 1.2]	(3,3.2]	0.464286	0.151464	0.734266
(1, 1.2]	(3.4,3.6]	0.5	0.152834	0.734266
(1, 1.2]	(3.6,3.8]	0.345865	0.466871	0.873975
(1, 1.2]	(3.8,4]	0.571429	0.309091	0.791323
(1.2,1.4]	(1.6,1.8]	0.110823	0.808752	0.946177
(1.2,1.4]	(2,2.2]	0.0870032	0.970276	0.997378
(1.2,1.4]	(2.2,2.4]	0.146617	0.58891	0.928841
(1.2,1.4]	(2.6,2.8]	0.198142	0.41422	0.852805
(1.2,1.4]	(2.8,3]	0.185855	0.512939	0.897642
(1.2,1.4]	(3.4,3.6]	0.368421	0.128128	0.734266
(1.2,1.4]	(3.6,3.8]	0.289474	0.226575	0.768955
(1.4,1.6]	(1.6,1.8]	0.0799025	0.838042	0.946177
(1.4,1.6]	(1.8,2]	0.0913462	0.724609	0.928841
(1.4,1.6]	(2,2.2]	0.138148	0.290624	0.791323
(1.4,1.6]	(2.2,2.4]	0.107642	0.633567	0.928841
(1.4,1.6]	(2.6,2.8]	0.141968	0.618575	0.928841
(1.4,1.6]	(2.8,3]	0.15625	0.535979	0.912719
(1.4,1.6]	(3,3.2]	0.15	0.78978	0.945624
(1.4,1.6]	(3.4,3.6]	0.346154	0.119377	0.734266
(1.4,1.6]	(3.6,3.8]	0.22166	0.353283	0.824327
(1.4,1.6]	(3.8,4]	0.326923	0.712612	0.928841
(1.6,1.8]	(2,2.2]	0.0893935	0.743073	0.928841
(1.6,1.8]	(2.4,2.6]	0.0789837	0.954541	0.997378
(1.6,1.8]	(2.6,2.8]	0.130075	0.686927	0.928841
(1.6,1.8]	(2.6,2.8]	0.130075	0.686927	0.928841
(1.6,1.8]	(2.8,3]	0.147447	0.565016	0.912719
(1.6,1.8]	(3.4,3.6]	0.295775	0.236424	0.768955
(1.6,1.8]	(3.4,3.6]	0.295775	0.236424	0.768955
(1.6,1.8]	(3.6,3.8]	0.232765	0.277136	0.786466
(1.8,2]	(2,2.2]	0.0924745	0.729548	0.928841
(1.8,2]	(2,2.2]	0.0924745	0.729548	0.928841
(1.8,2]	(2.2,2.4]	0.107041	0.594707	0.928841
(1.8,2]	(2.6,2.8]	0.15579	0.477921	0.873975
(1.8,2]	(3,3.2]	0.129688	0.895824	0.979807
(1.8,2]	(3.4,3.6]	0.34375	0.117545	0.734266
(1.8,2]	(3.6,3.8]	0.254523	0.194617	0.768955
(1.8,2]	(3.8,4]	0.289062	0.822551	0.946177
(2,2.2]	(2.2,2.4]	0.102968	0.704028	0.928841
(2,2.2]	(2.4,2.6]	0.103441	0.819485	0.946177
(2,2.2]	(2.6,2.8]	0.158463	0.49109	0.873975
(2,2.2]	(2.8,3]	0.19898	0.255597	0.768955
(2,2.2]	(3,3.2]	0.109184	0.97291	0.997378
(2,2.2]	(3.4,3.6]	0.336735	0.138484	0.734266
(2,2.2]	(3.6,3.8]	0.27927	0.136002	0.734266
(2,2.2]	(3.8,4]	0.316327	0.742656	0.928841
(2.2,2.4]	(2.4,2.6]	0.163738	0.340017	0.811405
(2.2,2.4]	(2.6,2.8]	0.210084	0.210518	0.768955
(2.2,2.4]	(2.8,3]	0.131899	0.766388	0.94186
(2.2,2.4]	(3,3.2]	0.106494	0.982124	0.997378
(2.2,2.4]	(3.4,3.6]	0.409091	0.0438738	0.658107
(2.2,2.4]	(3.8,4]	0.298701	0.792523	0.945624
(2.4,2.6]	(2.8,3]	0.196691	0.374031	0.849231
(2.4,2.6]	(3,3.2]	0.152941	0.83071	0.946177
(2.4,2.6]	(3.8,4]	0.333333	0.706355	0.928841
(2.6,2.8]	(2.8,3]	0.226103	0.310728	0.791323
(2.6,2.8]	(3,3.2]	0.208824	0.558518	0.912719
(2.6,2.8]	(3.4,3.6]	0.328431	0.235396	0.768955
(2.6,2.8]	(3.6,3.8]	0.188854	0.694969	0.928841
(2.6,2.8]	(3.8,4]	0.411765	0.484373	0.873975
(2.8,3]	(3,3.2]	0.13125	0.961455	0.997378
(2.8,3]	(3.4,3.6]	0.40625	0.0859402	0.734266
(2.8,3]	(3.6,3.8]	0.309211	0.161282	0.736286
(2.8,3]	(3.8,4]	0.25	0.959239	0.997378
(3,3.2]	(3.4,3.6]	0.35	0.263528	0.768955
(3,3.2]	(3.6,3.8]	0.284211	0.327756	0.800335
(3,3.2]	(3.8,4]	0.25	0.975908	0.997378
(3.4,3.6]	(3.6,3.8]	0.311404	0.385062	0.849231
(3.4,3.6]	(3.8,4]	0.5	0.404396	0.849231
(3.6,3.8]	(3.8,4]	0.368421	0.66629	0.928841

## Sheet: B-KS.TEST_rice_pcc
bin_1	bin_2	D	p.value	p.adj
(0,0.2]	(0.2,0.4]	0.8	0.0131752	0.0592885
(0,0.2]	(0.4,0.6]	0.8384	0.00748833	0.0377599
(0,0.2]	(0.6,0.8]	0.913137	0.00258428	0.0194256
(0,0.2]	(0.8,1]	0.925606	0.00221232	0.017815
(0,0.2]	(1, 1.2]	0.912752	0.00303504	0.0201896
(0,0.2]	(1.2,1.4]	0.913043	0.000385877	0.0041473
(0,0.2]	(1.4,1.6]	0.859649	0.0079773	0.0381415
(0,0.2]	(1.6,1.8]	0.978723	4.0016e-05	0.000874636
(0,0.2]	(1.8,2]	1	2.43158e-05	0.000620053
(0,0.2]	(2,2.2]	1	0.000334169	0.0040099
(0,0.2]	(2.2,2.4]	1	0.000515996	0.00493421
(0,0.2]	(2.4,2.6]	1	0.0010989	0.00934066
(0,0.2]	(2.6,2.8]	1	0.00606061	0.0319749
(0,0.2]	(2.8,3]	1	0.0571429	0.20084
(0,0.2]	(3,3.2]	1	0.133333	0.33239
(0,0.2]	(3.4,3.6]	1	0.133333	0.33239
(0,0.2]	(3.6,3.8]	1	0.133333	0.33239
(0.2,0.4]	(0.4,0.6]	0.134	0.877364	0.945295
(0.2,0.4]	(0.6,0.8]	0.236971	0.218152	0.444079
(0.2,0.4]	(0.8,1]	0.321107	0.0371306	0.145666
(0.2,0.4]	(1, 1.2]	0.22349	0.341851	0.594355
(0.2,0.4]	(1.2,1.4]	0.366667	0.0223522	0.0949967
(0.2,0.4]	(1.4,1.6]	0.314035	0.107838	0.317292
(0.2,0.4]	(1.6,1.8]	0.465957	0.00279322	0.0194256
(0.2,0.4]	(1.8,2]	0.471429	0.00445847	0.0263494
(0.2,0.4]	(2,2.2]	0.423529	0.0527011	0.191983
(0.2,0.4]	(2.2,2.4]	0.566667	0.00484965	0.0274813
(0.2,0.4]	(2.4,2.6]	0.3	0.437635	0.676345
(0.2,0.4]	(2.6,2.8]	0.607143	0.0267896	0.107864
(0.2,0.4]	(2.8,3]	0.666667	0.110672	0.319487
(0.2,0.4]	(3,3.2]	0.55	0.47619	0.714286
(0.2,0.4]	(3.4,3.6]	0.5	0.649351	0.834879
(0.2,0.4]	(3.6,3.8]	0.55	0.47619	0.714286
(0.4,0.6]	(0.6,0.8]	0.193147	2.09832e-14	1.60522e-12
(0.4,0.6]	(0.8,1]	0.272451	0	0
(0.4,0.6]	(1, 1.2]	0.200215	0.000129367	0.00219924
(0.4,0.6]	(1.2,1.4]	0.322481	4.87597e-06	0.000149205
(0.4,0.6]	(1.4,1.6]	0.289235	0.000320166	0.0040099
(0.4,0.6]	(1.6,1.8]	0.447591	4.94881e-08	2.52389e-06
(0.4,0.6]	(1.8,2]	0.466514	1.08552e-06	4.1521e-05
(0.4,0.6]	(2,2.2]	0.447059	0.00267927	0.0194256
(0.4,0.6]	(2.2,2.4]	0.538667	0.000406598	0.0041473
(0.4,0.6]	(2.4,2.6]	0.3784	0.0686569	0.228359
(0.4,0.6]	(2.6,2.8]	0.650743	0.00568618	0.0310709
(0.4,0.6]	(2.8,3]	0.645867	0.165576	0.398438
(0.4,0.6]	(3,3.2]	0.5808	0.51187	0.745868
(0.4,0.6]	(3.4,3.6]	0.4968	0.708804	0.870149
(0.4,0.6]	(3.6,3.8]	0.536	0.615717	0.828214
(0.6,0.8]	(0.8,1]	0.10306	0.000340711	0.0040099
(0.6,0.8]	(1, 1.2]	0.0501308	0.887657	0.945295
(0.6,0.8]	(1.2,1.4]	0.149526	0.105738	0.317213
(0.6,0.8]	(1.4,1.6]	0.12054	0.403886	0.661617
(0.6,0.8]	(1.6,1.8]	0.342136	4.76756e-05	0.000911796
(0.6,0.8]	(1.8,2]	0.306246	0.0033094	0.0210975
(0.6,0.8]	(2,2.2]	0.287403	0.124723	0.33239
(0.6,0.8]	(2.2,2.4]	0.420436	0.010532	0.0488301
(0.6,0.8]	(2.4,2.6]	0.264537	0.375761	0.631774
(0.6,0.8]	(2.6,2.8]	0.489591	0.070941	0.230936
(0.6,0.8]	(2.8,3]	0.62503	0.192687	0.429919
(0.6,0.8]	(3,3.2]	0.458722	0.794693	0.904177
(0.6,0.8]	(3.4,3.6]	0.494975	0.71207	0.870149
(0.6,0.8]	(3.6,3.8]	0.369706	0.947732	0.974983
(0.8,1]	(1, 1.2]	0.115754	0.0836182	0.261094
(0.8,1]	(1.2,1.4]	0.0863547	0.747496	0.877339
(0.8,1]	(1.4,1.6]	0.109179	0.566394	0.802392
(0.8,1]	(1.6,1.8]	0.304057	0.000646669	0.00582002
(0.8,1]	(1.8,2]	0.263421	0.0205099	0.0896574
(0.8,1]	(2,2.2]	0.235294	0.319968	0.586207
(0.8,1]	(2.2,2.4]	0.38985	0.0234939	0.0971505
(0.8,1]	(2.4,2.6]	0.228374	0.571994	0.802891
(0.8,1]	(2.6,2.8]	0.415966	0.182497	0.423061
(0.8,1]	(2.8,3]	0.625144	0.193885	0.429919
(0.8,1]	(3,3.2]	0.527682	0.635645	0.831717
(0.8,1]	(3.4,3.6]	0.491349	0.721739	0.870149
(0.8,1]	(3.6,3.8]	0.368512	0.949493	0.974983
(1, 1.2]	(1.2,1.4]	0.160393	0.17657	0.415619
(1, 1.2]	(1.4,1.6]	0.119981	0.592979	0.819643
(1, 1.2]	(1.6,1.8]	0.351849	0.000287771	0.0040099
(1, 1.2]	(1.8,2]	0.328092	0.00447767	0.0263494
(1, 1.2]	(2,2.2]	0.304777	0.117438	0.33239
(1, 1.2]	(2.2,2.4]	0.451902	0.0076507	0.0377599
(1, 1.2]	(2.4,2.6]	0.285235	0.326827	0.586207
(1, 1.2]	(2.6,2.8]	0.514861	0.0577578	0.20084
(1, 1.2]	(2.8,3]	0.612975	0.219125	0.444079
(1, 1.2]	(3,3.2]	0.463087	0.791157	0.904177
(1, 1.2]	(3.4,3.6]	0.479866	0.753767	0.877339
(1, 1.2]	(3.6,3.8]	0.375839	0.943183	0.974983
(1.2,1.4]	(1.4,1.6]	0.132723	0.641455	0.831717
(1.2,1.4]	(1.6,1.8]	0.248844	0.0508339	0.189697
(1.2,1.4]	(1.8,2]	0.237267	0.120225	0.33239
(1.2,1.4]	(2,2.2]	0.226769	0.415132	0.661617
(1.2,1.4]	(2.2,2.4]	0.333333	0.100946	0.308896
(1.2,1.4]	(2.4,2.6]	0.181159	0.827657	0.924317
(1.2,1.4]	(2.6,2.8]	0.436853	0.130152	0.33239
(1.2,1.4]	(2.8,3]	0.565217	0.230047	0.457106
(1.2,1.4]	(3,3.2]	0.550725	0.42495	0.663442
(1.2,1.4]	(3.4,3.6]	0.442029	0.727968	0.870149
(1.2,1.4]	(3.6,3.8]	0.391304	0.854728	0.934096
(1.4,1.6]	(1.6,1.8]	0.258679	0.0636552	0.216428
(1.4,1.6]	(1.8,2]	0.295238	0.0456297	0.174534
(1.4,1.6]	(2,2.2]	0.278638	0.261218	0.505903
(1.4,1.6]	(2.2,2.4]	0.368421	0.0796112	0.253761
(1.4,1.6]	(2.4,2.6]	0.201754	0.814503	0.916315
(1.4,1.6]	(2.6,2.8]	0.471178	0.125522	0.33239
(1.4,1.6]	(2.8,3]	0.561404	0.330257	0.586207
(1.4,1.6]	(3,3.2]	0.54386	0.617101	0.828214
(1.4,1.6]	(3.4,3.6]	0.464912	0.797804	0.904177
(1.4,1.6]	(3.6,3.8]	0.333333	0.98272	1
(1.6,1.8]	(1.8,2]	0.126444	0.850839	0.934096
(1.6,1.8]	(2,2.2]	0.190238	0.75692	0.877339
(1.6,1.8]	(2.2,2.4]	0.248227	0.411331	0.661617
(1.6,1.8]	(2.4,2.6]	0.343972	0.208038	0.442081
(1.6,1.8]	(2.6,2.8]	0.261398	0.703684	0.870149
(1.6,1.8]	(2.8,3]	0.624113	0.134694	0.33239
(1.6,1.8]	(3,3.2]	0.638298	0.290816	0.556186
(1.6,1.8]	(3.4,3.6]	0.5	0.55017	0.794113
(1.6,1.8]	(3.6,3.8]	0.574468	0.392857	0.653339
(1.8,2]	(2,2.2]	0.164706	0.849196	0.934096
(1.8,2]	(2.2,2.4]	0.247619	0.474456	0.714286
(1.8,2]	(2.4,2.6]	0.290476	0.367353	0.6245
(1.8,2]	(2.6,2.8]	0.228571	0.889689	0.945295
(1.8,2]	(2.8,3]	0.580952	0.211	0.442234
(1.8,2]	(3,3.2]	0.714286	0.198198	0.433205
(1.8,2]	(3.4,3.6]	0.5	0.566066	0.802392
(1.8,2]	(3.6,3.8]	0.6	0.36036	0.619496
(2,2.2]	(2.2,2.4]	0.27451	0.492824	0.72502
(2,2.2]	(2.4,2.6]	0.25	0.660726	0.842426
(2,2.2]	(2.6,2.8]	0.210084	0.947894	0.974983
(2,2.2]	(2.8,3]	0.607843	0.205263	0.442081
(2,2.2]	(3,3.2]	0.647059	0.327485	0.586207
(2,2.2]	(3.4,3.6]	0.5	0.625731	0.831717
(2,2.2]	(3.6,3.8]	0.588235	0.421053	0.663442
(2.2,2.4]	(2.4,2.6]	0.35	0.314172	0.5862
(2.2,2.4]	(2.6,2.8]	0.238095	0.889565	0.945295
(2.2,2.4]	(2.8,3]	0.533333	0.411765	0.661617
(2.2,2.4]	(3,3.2]	0.733333	0.220588	0.444079
(2.2,2.4]	(3.4,3.6]	0.5	0.639706	0.831717
(2.2,2.4]	(3.6,3.8]	0.666667	0.308824	0.583333
(2.4,2.6]	(2.6,2.8]	0.357143	0.492101	0.72502
(2.4,2.6]	(2.8,3]	0.666667	0.189011	0.429919
(2.4,2.6]	(3,3.2]	0.5	0.725275	0.870149
(2.4,2.6]	(3.4,3.6]	0.5	0.725275	0.870149
(2.4,2.6]	(3.6,3.8]	0.5	0.725275	0.870149
(2.6,2.8]	(2.8,3]	0.666667	0.25	0.490385
(2.6,2.8]	(3,3.2]	0.857143	0.166667	0.398438
(2.6,2.8]	(3.4,3.6]	0.5	0.75	0.877339
(2.6,2.8]	(3.6,3.8]	0.714286	0.333333	0.586207
(2.8,3]	(3,3.2]	0.666667	0.6	0.819643
(2.8,3]	(3.4,3.6]	0.5	0.9	0.949655
(2.8,3]	(3.6,3.8]	0.666667	0.6	0.819643
(3,3.2]	(3.4,3.6]	0.5	1	1
(3,3.2]	(3.6,3.8]	0.5	1	1
(3.4,3.6]	(3.6,3.8]	0.5	1	1
