# Supplementary material for: Phylogenomic analyses across land plants reveals motifs and coexpression patterns useful for functional prediction in the BAHD acyltransferase family
Source: Front Plant Sci. 2023 Feb 10;14:1067613. doi: 10.3389/fpls.2023.1067613 (PMC9950517; doi:10.3389/fpls.2023.1067613)
Supplement: Supplementary File 2 — Excel file containing the results of the co-expression prediction pipeline. [file Table_2.xlsx]

## Sheet: Legend
		Supplementary File 2: Pathways statistically enriched among correlated genes of BAHDs. Prior to the black-shaded column are results of co-expression analysis, and after the column are results of our orthology-based BAHD prediction pipeline (Kruse et al, 2022). The "Known Pathway" column indicates the pathway assigned to the gene by AraCyc. The Manual Annotation column is the best guess for what t…

## Sheet: Data
#Gene	AltID	Manual annotation	KnownPWY	EnrichedPWYS		#Gene	OG	MatchHook	PhylogeneticRange	MostCommonClass	AllCharacterized
AT2G19070	SHT		PWY-6442|spermidine_hydroxycinnamic_acid_conjugates_biosynthesis	LIPAS-PWY|triacylglycerol_degradation|6; PWY-6733|sporopollenin_precursors_biosynthesis|4; PWY-1121|suberin_monomers_biosynthesis|3; PWY-321|cutin_biosynthesis|2		AT2G19070	OG0000019	Atha_AT2G19070.1|OG0000019	dicots	Aromatic_alcohols	ArHPT1_QAA12830.1|Aromatic_alcohols;AtSHT_AT2G19070.1|Aliphatic_amines;CiSHT1_MG457243.1|Aromatic_alcohols,Aliphatic_amines;CiSHT2_MG457244.1|Aromatic_alcohols,Aliphatic_amines
AT2G39980	AT2G39980		PWY-5868|simple_coumarins_biosynthesis; PWY-6040|chlorogenic_acid_biosynthesis_II; PWY-361|phenylpropanoid_biosynthesis; PWY-6039|chlorogenic_acid_biosynthesis_I	PWY-7985|oxalate_degradation_VI|2		AT2G39980	OG0000009	Atha_AT2G39980.1|OG0000009	gymnosperms	NA	NA
AT1G78990	AT1G78990	Lipid/aromatics biosynthesis	PWY-5410|traumatin_and_(<i>Z</i>)-3-hexen-1-yl_acetate_biosynthesis; PWY-6801|volatile_esters_biosynthesis_(during_fruit_ripening); PWY-4203|volatile_benzenoid_biosynthesis_I_(ester_formation); PWY-5859|eugenol_and_isoeugenol_biosynthesis	LIPAS-PWY|triacylglycerol_degradation|6; PWY-5884|wax_esters_biosynthesis_I|3; PWY-6733|sporopollenin_precursors_biosynthesis|5; PWY-1121|suberin_monomers_biosynthesis|3; PWY-5989|stearate_biosynthesis_II_(bacteria_and_plants)|3; PWY-5971|palmitate_biosynthesis_II_(bacteria_and_plants)|3; PWY-321|cutin_biosynthesis|2; PWY-5147|oleate_biosynthesis_I_(plants)|3; PWY-5973|<i>cis</i>-vaccenate_biosyn…		AT1G78990	OG0000007	Atha_AT1G78990.1|OG0000007	gymnosperms	Aromatic_alcohols	ObCAAT2_QKK36037.1|Aromatic_alcohols;PaxCFAT_DQ767969.1|Aromatic_alcohols,Aliphatic_alcohols,Terpenoids
AT5G47980	AT5G47980		PWY-5410|traumatin_and_(<i>Z</i>)-3-hexen-1-yl_acetate_biosynthesis; PWY-6801|volatile_esters_biosynthesis_(during_fruit_ripening); PWY-4203|volatile_benzenoid_biosynthesis_I_(ester_formation)	PWY-5992|thalianol_and_derivatives_biosynthesis|7; PWY-601|glucosinolate_biosynthesis_from_tryptophan|2; PWY-581|indole-3-acetate_biosynthesis_II|2; PWY-7184|pyrimidine_deoxyribonucleotides_<i>de_novo</i>_biosynthesis_I|2		AT5G47980	OG0000094	Atha_AT5G47980.1|OG0000094	dicots	Terpenoids	AtTHAA1_At5g47980|Terpenoids;AtBIA1_NP_193275.1_gen|NA
AT5G48930	HCT	Phenylpropanoids	PWY-5868|simple_coumarins_biosynthesis; PWY-6673|caffeoylglucarate_biosynthesis; PWY-6040|chlorogenic_acid_biosynthesis_II; PWY-361|phenylpropanoid_biosynthesis; PWY-6039|chlorogenic_acid_biosynthesis_I	PWY-1121|suberin_monomers_biosynthesis|9; PWY-361|phenylpropanoid_biosynthesis|11; PWY-7398|coumarins_biosynthesis_(engineered)|4; PWY-6039|chlorogenic_acid_biosynthesis_I|3; PWY-5868|simple_coumarins_biosynthesis|6; PWY-6982|umbelliferone_biosynthesis|3; PWY1F-FLAVSYN|flavonoid_biosynthesis|3; PWY-6040|chlorogenic_acid_biosynthesis_II|2; PWY-6549|L-glutamine_biosynthesis_III|3; PWY-6444|benzoate…		AT5G48930	OG0000002	Atha_AT5G48930.1|OG0000002	liverworts	Aromatic_alcohols	AsaHHT1_AB076980|Aromatic_alcohols;AtHCT_NM_124270.4|Aromatic_alcohols,Aromatic_amines,Flavonoids;CcaHCT_EF137954.1|Aromatic_alcohols;CcaHQT_EF153931.1|Aromatic_alcohols;CcHQT1_AM690438.2|Aromatic_alcohols;CcHQT2_EU839580.1|Aromatic_alcohols;CiHCT1_KT222891.1|Aromatic_alcohols;CiHCT2_KT222892.1|Aromatic_alcohols;CiHQT1_KT222893.1|Aromatic_alcohols;CiHQT2_KT222894.1|Aromatic_alcohols;CiHQT3_KT2228…
AT5G41040	RWP1	Lipids	PWY-7120|esterified_suberin_biosynthesis	LIPAS-PWY|triacylglycerol_degradation|6; PWY-5884|wax_esters_biosynthesis_I|4; PWY-6733|sporopollenin_precursors_biosynthesis|5; PWY-1121|suberin_monomers_biosynthesis|4; PWY-6443|benzoate_biosynthesis_I_(CoA-dependent,_&beta;-oxidative)|2; TRIGLSYN-PWY|diacylglycerol_and_triacylglycerol_biosynthesis|3; PWY-6444|benzoate_biosynthesis_II_(CoA-independent,_non-&beta;-oxidative)|2; PWY0-1319|CDP-dia…		AT5G41040	OG0000006	Atha_AT5G41040.1|OG0000006	mosses	Aliphatic_alcohols	AtASFT/HHT1_AY062996.1|NA;AtDCF_BT010448.1|Aliphatic_alcohols;AtFACT_AY142537.1|Aliphatic_alcohols;PtFHT1_JX515962.1|Aliphatic_alcohols;StFHT_NM_001288261.1|Aliphatic_alcohols
AT3G48720	DCF	Lipids	PWY-7120|esterified_suberin_biosynthesis	LIPAS-PWY|triacylglycerol_degradation|5; PWY-1121|suberin_monomers_biosynthesis|3; PWY-321|cutin_biosynthesis|3; PWY-6348|phosphate_acquisition|2; PWY-5080|very_long_chain_fatty_acid_biosynthesis_I|9; TRIGLSYN-PWY|diacylglycerol_and_triacylglycerol_biosynthesis|3; PWY0-1319|CDP-diacylglycerol_biosynthesis_II|2; PWY-5667|CDP-diacylglycerol_biosynthesis_I|3; PWYQT-4482|CDP-diacylglycerol_biosynthes…		AT3G48720	OG0000006	Atha_AT3G48720.1|OG0000006	mosses	Aliphatic_alcohols	AtASFT/HHT1_AY062996.1|NA;AtDCF_BT010448.1|Aliphatic_alcohols;AtFACT_AY142537.1|Aliphatic_alcohols;PtFHT1_JX515962.1|Aliphatic_alcohols;StFHT_NM_001288261.1|Aliphatic_alcohols
AT5G63560	FACT	Lipids	PWY-7120|esterified_suberin_biosynthesis	LIPAS-PWY|triacylglycerol_degradation|7; PWY-5884|wax_esters_biosynthesis_I|4; PWY-6733|sporopollenin_precursors_biosynthesis|4; PWY-6787|flavonoid_biosynthesis_(in_equisetum)|2; PWY-5391|syringetin_biosynthesis|2; PWY-3101|flavonol_biosynthesis|2; PWY-4203|volatile_benzenoid_biosynthesis_I_(ester_formation)|2		AT5G63560	OG0000006	Atha_AT5G63560.1|OG0000006	mosses	Aliphatic_alcohols	AtASFT/HHT1_AY062996.1|NA;AtDCF_BT010448.1|Aliphatic_alcohols;AtFACT_AY142537.1|Aliphatic_alcohols;PtFHT1_JX515962.1|Aliphatic_alcohols;StFHT_NM_001288261.1|Aliphatic_alcohols
AT5G42830	AT5G42830	Phenylpropanoids during defense	PWY-5868|simple_coumarins_biosynthesis; PWY-6040|chlorogenic_acid_biosynthesis_II; PWY-361|phenylpropanoid_biosynthesis; PWY-6039|chlorogenic_acid_biosynthesis_I	PWY-1121|suberin_monomers_biosynthesis|2; PWY-6792|scopoletin_biosynthesis|2; PWY-361|phenylpropanoid_biosynthesis|4; PWY-7398|coumarins_biosynthesis_(engineered)|3; PWY-6039|chlorogenic_acid_biosynthesis_I|2; PWY-6443|benzoate_biosynthesis_I_(CoA-dependent,_&beta;-oxidative)|3; PWYQT-4477|indole_glucosinolate_activation_(intact_plant_cell)|2; PWY-601|glucosinolate_biosynthesis_from_tryptophan|2;…		AT5G42830	OG0000004	Atha_AT5G42830.1|OG0000004	gymnosperms	NA	NA
AT3G03480	CHAT	Traumatin etc. biosynthesis	PWY-5410|traumatin_and_(<i>Z</i>)-3-hexen-1-yl_acetate_biosynthesis	PWY-5410|traumatin_and_(<i>Z</i>)-3-hexen-1-yl_acetate_biosynthesis|2; PWY-2902|cytokinin-<i>O</i>-glucosides_biosynthesis|2; PWY-6927|chlorophyll_<i>a</i>_degradation_II|2		AT3G03480	OG0000000	Atha_AT3G03480.1|OG0000000	gymnosperms	Aromatic_alcohols	AtCHAT_AF500201.1|Aromatic_alcohols,Aliphatic_alcohols,Terpenoids;CbBEBT_AF500200|Aromatic_alcohols;CmAAT1_CAA94432.1|Aromatic_alcohols,Aliphatic_alcohols;CmAAT3_AY859053|Aromatic_alcohols,Aliphatic_alcohols;LaHMT_HLT_AB181292|Alkaloids;MdAAT1_AY707098|Aromatic_alcohols,Aliphatic_alcohols;MdAAT2_AY517491.1_gen|NA;NtBEBT_AF500202|Aromatic_alcohols;OsSAT2_XM_015763244.1_gen|NA;PhBPBT_AY611496|Aroma…
AT5G07870	AT5G07870	Defense phenolics	PWY-5868|simple_coumarins_biosynthesis; PWY-6040|chlorogenic_acid_biosynthesis_II; PWY-361|phenylpropanoid_biosynthesis; PWY-6039|chlorogenic_acid_biosynthesis_I	PWY-5321|quercetin_glycoside_biosynthesis_(Arabidopsis)|4; PWY-5390|rutin_biosynthesis|4; PWY-6051|2,4,6-trinitrotoluene_degradation|2; PWY-5320|kaempferol_glycoside_biosynthesis_(Arabidopsis)|2; PWY-6842|glutathione-mediated_detoxification_II|4; PWY-5027|phylloquinol_biosynthesis|2		AT5G07870	OG0000004	Atha_AT5G07870.1|OG0000004	gymnosperms	NA	NA
AT5G23940	PEL3	Lipid biosynthesis (altered cuticular layer)	PWY-5868|simple_coumarins_biosynthesis; PWY-6040|chlorogenic_acid_biosynthesis_II; PWY-361|phenylpropanoid_biosynthesis; PWY-6039|chlorogenic_acid_biosynthesis_I	LIPAS-PWY|triacylglycerol_degradation|5; PWY-6733|sporopollenin_precursors_biosynthesis|4; PWY-1121|suberin_monomers_biosynthesis|6; PWY-321|cutin_biosynthesis|7; PWY-282|cuticular_wax_biosynthesis|2; PWY-782|glycolipid_desaturation|2		AT5G23940	OG0000018	Atha_AT5G23940.1|OG0000018	gymnosperms	NA	AtDCR_BT000770.1_gen|NA;LanAAT2_DQ886905.1|NA;ObCAAT1_QKK36036.1|Aromatic_alcohols
AT3G50280	AT3G50280	Defense phenolics	PWY-5868|simple_coumarins_biosynthesis; PWY-6040|chlorogenic_acid_biosynthesis_II; PWY-361|phenylpropanoid_biosynthesis; PWY-6039|chlorogenic_acid_biosynthesis_I	PWY-735|jasmonic_acid_biosynthesis|3; PWY-601|glucosinolate_biosynthesis_from_tryptophan|3; PWYQT-4471|glucosinolate_biosynthesis_from_dihomomethionine|4; PWYQT-4473|glucosinolate_biosynthesis_from_tetrahomomethionine|2; PWYQT-4472|glucosinolate_biosynthesis_from_trihomomethionine|2; PWY-1187|glucosinolate_biosynthesis_from_homomethionine|2; PWYQT-4474|glucosinolate_biosynthesis_from_pentahomomet…		AT3G50280	OG0000003	Atha_AT3G50280.1|OG0000003	gymnosperms	Aromatic_alcohols	AtEPS1_NM_126116.2|Aromatic_alcohols
AT2G40230	AT2G40230	Phospholipids? Volatile esters?	PWY-6801|volatile_esters_biosynthesis_(during_fruit_ripening)	PWY-6803|phosphatidylcholine_acyl_editing|2; PWY-7416|phospholipid_remodeling_(phosphatidylcholine,_yeast)|2; LIPASYN-PWY|phospholipases|2		AT2G40230	OG0000025	Atha_AT2G40230.1|OG0000025	angiosperms	NA	NA
AT5G67150	AT5G67150	Defense phenolics	PWY-5868|simple_coumarins_biosynthesis; PWY-6040|chlorogenic_acid_biosynthesis_II; PWY-361|phenylpropanoid_biosynthesis; PWY-6039|chlorogenic_acid_biosynthesis_I	PWY-735|jasmonic_acid_biosynthesis|3; PWY-601|glucosinolate_biosynthesis_from_tryptophan|11; CYSTSYN-PWY|L-cysteine_biosynthesis_I|2; PWY-801|homocysteine_and_cysteine_interconversion|3; TRPSYN-PWY|L-tryptophan_biosynthesis|2; PWYQT-4471|glucosinolate_biosynthesis_from_dihomomethionine|14; PWY-8024|4-hydroxyindole-3-carbonyl_nitrile_biosynthesis|2; PWYQT-4473|glucosinolate_biosynthesis_from_tetra…		AT5G67150	OG0000003	Atha_AT5G67150.1|OG0000003	gymnosperms	Aromatic_alcohols	AtEPS1_NM_126116.2|Aromatic_alcohols
AT5G67160	EPS1	Defense phenolics	PWY-5868|simple_coumarins_biosynthesis; PWY-6040|chlorogenic_acid_biosynthesis_II; PWY-361|phenylpropanoid_biosynthesis; PWY-6039|chlorogenic_acid_biosynthesis_I	PWY-5321|quercetin_glycoside_biosynthesis_(Arabidopsis)|2; PWY-5390|rutin_biosynthesis|2; PWY-601|glucosinolate_biosynthesis_from_tryptophan|2; PWY-5320|kaempferol_glycoside_biosynthesis_(Arabidopsis)|2; PWYQT-4471|glucosinolate_biosynthesis_from_dihomomethionine|3; PWYQT-4473|glucosinolate_biosynthesis_from_tetrahomomethionine|3; PWYQT-4472|glucosinolate_biosynthesis_from_trihomomethionine|3; PW…		AT5G67160	OG0000003	Atha_AT5G67160.1|OG0000003	gymnosperms	Aromatic_alcohols	AtEPS1_NM_126116.2|Aromatic_alcohols
AT3G50270	AT3G50270		PWY-5868|simple_coumarins_biosynthesis; PWY-6040|chlorogenic_acid_biosynthesis_II; PWY-361|phenylpropanoid_biosynthesis; PWY-6039|chlorogenic_acid_biosynthesis_I	PWY-735|jasmonic_acid_biosynthesis|2; PWY-101|photosynthesis_light_reactions|3; OXIDATIVEPENT-PWY|pentose_phosphate_pathway_(oxidative_branch)_I|2; PWY-5098|chlorophyll_<i>a</i>_degradation_I|2		AT3G50270	OG0000003	Atha_AT3G50270.1|OG0000003	gymnosperms	Aromatic_alcohols	AtEPS1_NM_126116.2|Aromatic_alcohols
AT3G50300	AT3G50300	Volatile benzenoids	PWY-5868|simple_coumarins_biosynthesis; PWY-6040|chlorogenic_acid_biosynthesis_II; PWY-361|phenylpropanoid_biosynthesis; PWY-6039|chlorogenic_acid_biosynthesis_I	PWY-5992|thalianol_and_derivatives_biosynthesis|5; PWY-116|coniferin_metabolism|2; PWY-581|indole-3-acetate_biosynthesis_II|2; PWY-4203|volatile_benzenoid_biosynthesis_I_(ester_formation)|2		AT3G50300	OG0000003	Atha_AT3G50300.1|OG0000003	gymnosperms	Aromatic_alcohols	AtEPS1_NM_126116.2|Aromatic_alcohols
AT5G39050	PMAT1	Defense phenolics	PWY-6930|phenolic_malonylglucosides_biosynthesis	PWY-5410|traumatin_and_(<i>Z</i>)-3-hexen-1-yl_acetate_biosynthesis|3; PWY-5321|quercetin_glycoside_biosynthesis_(Arabidopsis)|9; PWY-5390|rutin_biosynthesis|9; PWY-5136|fatty_acid_&beta;-oxidation_II_(peroxisome)|2; PWY-2902|cytokinin-<i>O</i>-glucosides_biosynthesis|6; PWY-6051|2,4,6-trinitrotoluene_degradation|5; PWY-5272|abscisic_acid_degradation_by_glucosylation|2; PWY-5348|kaempferol_triglu…		AT5G39050	OG0000001	Atha_AT5G39050.1|OG0000001	dicot-monocot	Flavonoids	At5Mat_NM_113880.2|Anthocyanins;AtACT_NM_125509.3|Aliphatic_amines;GmIF7MaT_NM_001250831.1|Flavonoids;GmIMaT1_KY399789.1|Flavonoids;GmIMaT3_KY399790.1|Flavonoids;GmMT7_EU192928.1|Flavonoids;MtMaT1_EU272030.1|Flavonoids;MtMaT2_EU272032.1|Flavonoids;MtMaT3_EU272031.1|Flavonoids
AT3G29590	AT5MAT	Anthocyanins	PWY-7450|anthocyanidin_modification_(<i>Arabidopsis</i>); PWY-5268|salvianin_biosynthesis	PWY-1001|cellulose_biosynthesis|2; PWY1F-FLAVSYN|flavonoid_biosynthesis|4; PWY-5125|anthocyanin_biosynthesis|2; PWY-3301|sinapate_ester_biosynthesis|2; PWY-6787|flavonoid_biosynthesis_(in_equisetum)|5; PWY1F-823|leucopelargonidin_and_leucocyanidin_biosynthesis|3; PWY-7450|anthocyanidin_modification_(<i>Arabidopsis</i>)|6; PWY-7267|anthocyanin_biosynthesis_(pelargonidin_3-<i>O</i>-glucoside)|2		AT3G29590	OG0000001	Atha_AT3G29590.1|OG0000001	dicot-monocot	Flavonoids	At5Mat_NM_113880.2|Anthocyanins;AtACT_NM_125509.3|Aliphatic_amines;GmIF7MaT_NM_001250831.1|Flavonoids;GmIMaT1_KY399789.1|Flavonoids;GmIMaT3_KY399790.1|Flavonoids;GmMT7_EU192928.1|Flavonoids;MtMaT1_EU272030.1|Flavonoids;MtMaT2_EU272032.1|Flavonoids;MtMaT3_EU272031.1|Flavonoids
AT5G39080	AT5G39080		PWY-6930|phenolic_malonylglucosides_biosynthesis	PWY-2902|cytokinin-<i>O</i>-glucosides_biosynthesis|2		AT5G39080	OG0000001	Atha_AT5G39080.1|OG0000001	dicot-monocot	Flavonoids	At5Mat_NM_113880.2|Anthocyanins;AtACT_NM_125509.3|Aliphatic_amines;GmIF7MaT_NM_001250831.1|Flavonoids;GmIMaT1_KY399789.1|Flavonoids;GmIMaT3_KY399790.1|Flavonoids;GmMT7_EU192928.1|Flavonoids;MtMaT1_EU272030.1|Flavonoids;MtMaT2_EU272032.1|Flavonoids;MtMaT3_EU272031.1|Flavonoids
AT1G03495	AT1G03495	Anthocyanins	PWY-7450|anthocyanidin_modification_(<i>Arabidopsis</i>)	PWY1F-823|leucopelargonidin_and_leucocyanidin_biosynthesis|2; PWY-7450|anthocyanidin_modification_(<i>Arabidopsis</i>)|4		AT1G03495	OG0000017	Atha_AT1G03495.1|OG0000017	dicots	Flavonoids	At3AT1_NM_100275.3|Flavonoids,Anthocyanins;At3AT2_NM_100232.5|Flavonoids,Anthocyanins
AT1G03940	AT1G03940	Anthocyanins	PWY-7450|anthocyanidin_modification_(<i>Arabidopsis</i>)	PWY1F-823|leucopelargonidin_and_leucocyanidin_biosynthesis|2; PWY-7450|anthocyanidin_modification_(<i>Arabidopsis</i>)|4		AT1G03940	OG0000017	Atha_AT1G03940.1|OG0000017	dicots	Flavonoids	At3AT1_NM_100275.3|Flavonoids,Anthocyanins;At3AT2_NM_100232.5|Flavonoids,Anthocyanins
AT4G24510	CER2	Lipids	PWY-5080|very_long_chain_fatty_acid_biosynthesis_I	LIPAS-PWY|triacylglycerol_degradation|14; PWY-6733|sporopollenin_precursors_biosynthesis|5; PWY-5143|long-chain_fatty_acid_activation|2; PWY-1121|suberin_monomers_biosynthesis|7; PWY-321|cutin_biosynthesis|7; PWY-5147|oleate_biosynthesis_I_(plants)|3; PWY-2724|alkane_oxidation|2; PWY-282|cuticular_wax_biosynthesis|2; PWY-5080|very_long_chain_fatty_acid_biosynthesis_I|17; PWY-5667|CDP-diacylglycer…		AT4G24510	OG0000014	Atha_AT4G24510.1|OG0000014	angiosperms	NA	AtCER2_AY087262_gen|NA
AT3G23840	AT3G23840	Lipids	PWY-5080|very_long_chain_fatty_acid_biosynthesis_I	LIPAS-PWY|triacylglycerol_degradation|4; PWY-321|cutin_biosynthesis|2		AT3G23840	OG0000014	Atha_AT3G23840.1|OG0000014	angiosperms	NA	AtCER2_AY087262_gen|NA
AT4G13840	AT4G13840		PWY-5080|very_long_chain_fatty_acid_biosynthesis_I	PWY-361|phenylpropanoid_biosynthesis|2		AT4G13840	OG0000014	Atha_AT4G13840.1|OG0000014	angiosperms	NA	AtCER2_AY087262_gen|NA
AT5G02890	AT5G02890	Lipids	PWY-5080|very_long_chain_fatty_acid_biosynthesis_I	LIPAS-PWY|triacylglycerol_degradation|9; PWY-6733|sporopollenin_precursors_biosynthesis|3; PWY-5143|long-chain_fatty_acid_activation|2; PWY-1121|suberin_monomers_biosynthesis|4; PWY-5989|stearate_biosynthesis_II_(bacteria_and_plants)|2; PWY-5971|palmitate_biosynthesis_II_(bacteria_and_plants)|2; PWY-321|cutin_biosynthesis|4; PWY-5147|oleate_biosynthesis_I_(plants)|2; PWY-5080|very_long_chain_fatt…		AT5G02890	OG0000030	Atha_AT5G02890.1|OG0000030	dicots	NA	NA
AT3G29670	PMAT2	Anthocyanins/flavonoids	PWY-6930|phenolic_malonylglucosides_biosynthesis	NA		AT3G29670	OG0000001	Atha_AT3G29670.1|OG0000001	dicot-monocot	Flavonoids	At5Mat_NM_113880.2|Anthocyanins;AtACT_NM_125509.3|Aliphatic_amines;GmIF7MaT_NM_001250831.1|Flavonoids;GmIMaT1_KY399789.1|Flavonoids;GmIMaT3_KY399790.1|Flavonoids;GmMT7_EU192928.1|Flavonoids;MtMaT1_EU272030.1|Flavonoids;MtMaT2_EU272032.1|Flavonoids;MtMaT3_EU272031.1|Flavonoids
AT4G31910	BAT1		PWY-7120|esterified_suberin_biosynthesis	NA		AT4G31910	OG0000036	Atha_AT4G31910.1|OG0000036	gymnosperms	NA	NA
AT5G16410	AT5G16410		PWY-5410|traumatin_and_(<i>Z</i>)-3-hexen-1-yl_acetate_biosynthesis; PWY-6801|volatile_esters_biosynthesis_(during_fruit_ripening); PWY-4203|volatile_benzenoid_biosynthesis_I_(ester_formation); PWY-5859|eugenol_and_isoeugenol_biosynthesis	NA		AT5G16410	OG0000007	Atha_AT5G16410.1|OG0000007	gymnosperms	Aromatic_alcohols	ObCAAT2_QKK36037.1|Aromatic_alcohols;PaxCFAT_DQ767969.1|Aromatic_alcohols,Aliphatic_alcohols,Terpenoids
AT5G39090	AT5G39090	Anthocyanins/flavonoids	PWY-6930|phenolic_malonylglucosides_biosynthesis	NA		AT5G39090	OG0000001	Atha_AT5G39090.1|OG0000001	dicot-monocot	Flavonoids	At5Mat_NM_113880.2|Anthocyanins;AtACT_NM_125509.3|Aliphatic_amines;GmIF7MaT_NM_001250831.1|Flavonoids;GmIMaT1_KY399789.1|Flavonoids;GmIMaT3_KY399790.1|Flavonoids;GmMT7_EU192928.1|Flavonoids;MtMaT1_EU272030.1|Flavonoids;MtMaT2_EU272032.1|Flavonoids;MtMaT3_EU272031.1|Flavonoids
AT5G57840	AT5G57840		PWY-5868|simple_coumarins_biosynthesis; PWY-6040|chlorogenic_acid_biosynthesis_II; PWY-361|phenylpropanoid_biosynthesis; PWY-6039|chlorogenic_acid_biosynthesis_I	NA		AT5G57840	OG0000002	Atha_AT5G57840.1|OG0000002	liverworts	Aromatic_alcohols	AsaHHT1_AB076980|Aromatic_alcohols;AtHCT_NM_124270.4|Aromatic_alcohols,Aromatic_amines,Flavonoids;CcaHCT_EF137954.1|Aromatic_alcohols;CcaHQT_EF153931.1|Aromatic_alcohols;CcHQT1_AM690438.2|Aromatic_alcohols;CcHQT2_EU839580.1|Aromatic_alcohols;CiHCT1_KT222891.1|Aromatic_alcohols;CiHCT2_KT222892.1|Aromatic_alcohols;CiHQT1_KT222893.1|Aromatic_alcohols;CiHQT2_KT222894.1|Aromatic_alcohols;CiHQT3_KT2228…
AT1G27620	AT1G27620		PWY-6801|volatile_esters_biosynthesis_(during_fruit_ripening)	NA		AT1G27620	OG0000020	Atha_AT1G27620.1|OG0000020	gymnosperms	NA	NA
AT1G32910	AT1G32910		NA	NA		AT1G32910	OG0000007	Atha_AT1G32910.1|OG0000007	gymnosperms	Aromatic_alcohols	ObCAAT2_QKK36037.1|Aromatic_alcohols;PaxCFAT_DQ767969.1|Aromatic_alcohols,Aliphatic_alcohols,Terpenoids
AT5G38130	AT5G38130		NA	NA		AT5G38130	OG0000003	Atha_AT5G38130.1|OG0000003	gymnosperms	Aromatic_alcohols	AtEPS1_NM_126116.2|Aromatic_alcohols
AT5G47950	AT5G47950		NA	NA		AT5G47950	OG0000080	Atha_AT5G47950.1|OG0000080	dicots	Terpenoids	AtTHAA2_At5g47950|Terpenoids
AT4G15400	AT4G15400		NA	NA		AT4G15400	OG0000094	Atha_AT4G15400.1|OG0000094	dicots	Terpenoids	AtTHAA1_At5g47980|Terpenoids;AtBIA1_NP_193275.1_gen|NA
AT5G07850	AT5G07850		NA	NA		AT5G07850	OG0000004	Atha_AT5G07850.1|OG0000004	gymnosperms	NA	NA
AT3G30280	AT3G30280		NA	NA		AT3G30280	OG0000080	Atha_AT3G30280.1|OG0000080	dicots	Terpenoids	AtTHAA2_At5g47950|Terpenoids
AT3G50290	AT3G50290		NA	NA		AT3G50290	OG0000003	Atha_AT3G50290.1|OG0000003	gymnosperms	Aromatic_alcohols	AtEPS1_NM_126116.2|Aromatic_alcohols
AT5G23970	AT5G23970		NA	NA		AT5G23970	OG0000080	Atha_AT5G23970.1|OG0000080	dicots	Terpenoids	AtTHAA2_At5g47950|Terpenoids
AT5G17540	AT5G17540		NA	NA		AT5G17540	OG0000000	Atha_AT5G17540.1|OG0000000	gymnosperms	Aromatic_alcohols	AtCHAT_AF500201.1|Aromatic_alcohols,Aliphatic_alcohols,Terpenoids;CbBEBT_AF500200|Aromatic_alcohols;CmAAT1_CAA94432.1|Aromatic_alcohols,Aliphatic_alcohols;CmAAT3_AY859053|Aromatic_alcohols,Aliphatic_alcohols;LaHMT_HLT_AB181292|Alkaloids;MdAAT1_AY707098|Aromatic_alcohols,Aliphatic_alcohols;MdAAT2_AY517491.1_gen|NA;NtBEBT_AF500202|Aromatic_alcohols;OsSAT2_XM_015763244.1_gen|NA;PhBPBT_AY611496|Aroma…
AT2G23510	AT2G23510		NA	NA		AT2G23510	OG0000136	Atha_AT2G23510.1|OG0000136	dicots	Aliphatic_amines	AtSDT_NM_127915.2|Aliphatic_amines
AT1G28680	AT1G28680		NA	NA		AT1G28680	OG0000027	Atha_AT1G28680.1|OG0000027	dicot-monocot	NA	NA
AT3G29690	AT3G29690		NA	NA		AT3G29690	OG0000001	Atha_AT3G29690.1|OG0000001	dicot-monocot	Flavonoids	At5Mat_NM_113880.2|Anthocyanins;AtACT_NM_125509.3|Aliphatic_amines;GmIF7MaT_NM_001250831.1|Flavonoids;GmIMaT1_KY399789.1|Flavonoids;GmIMaT3_KY399790.1|Flavonoids;GmMT7_EU192928.1|Flavonoids;MtMaT1_EU272030.1|Flavonoids;MtMaT2_EU272032.1|Flavonoids;MtMaT3_EU272031.1|Flavonoids
AT5G01210	AT5G01210		NA	NA		AT5G01210	OG0000009	Atha_AT5G01210.1|OG0000009	gymnosperms	NA	NA
AT5G61160	AT5G61160		NA	NA		AT5G61160	OG0000001	Atha_AT5G61160.1|OG0000001	dicot-monocot	Flavonoids	At5Mat_NM_113880.2|Anthocyanins;AtACT_NM_125509.3|Aliphatic_amines;GmIF7MaT_NM_001250831.1|Flavonoids;GmIMaT1_KY399789.1|Flavonoids;GmIMaT3_KY399790.1|Flavonoids;GmMT7_EU192928.1|Flavonoids;MtMaT1_EU272030.1|Flavonoids;MtMaT2_EU272032.1|Flavonoids;MtMaT3_EU272031.1|Flavonoids
AT1G24420	AT1G24420		NA	NA		AT1G24420	OG0000013	Atha_AT1G24420.1|OG0000013	dicots	NA	NA
AT3G47170	AT3G47170		NA	NA		AT3G47170	OG0000024	Atha_AT3G47170.1|OG0000024	dicots	Aliphatic_amines	AtSCT_BT009686.1|Aliphatic_amines
AT1G03390	AT1G03390		NA	NA		AT1G03390	OG0000035	Atha_AT1G03390.1|OG0000035	gymnosperms	NA	NA
AT4G15390	AT4G15390		NA	NA		AT4G15390	OG0000080	Atha_AT4G15390.1|OG0000080	dicots	Terpenoids	AtTHAA2_At5g47950|Terpenoids
AT3G29635	AT3G29635		NA	NA		AT3G29635	OG0000001	Atha_AT3G29635.1|OG0000001	dicot-monocot	Flavonoids	At5Mat_NM_113880.2|Anthocyanins;AtACT_NM_125509.3|Aliphatic_amines;GmIF7MaT_NM_001250831.1|Flavonoids;GmIMaT1_KY399789.1|Flavonoids;GmIMaT3_KY399790.1|Flavonoids;GmMT7_EU192928.1|Flavonoids;MtMaT1_EU272030.1|Flavonoids;MtMaT2_EU272032.1|Flavonoids;MtMaT3_EU272031.1|Flavonoids
AT3G29636	AT3G29636		NA	NA		AT3G29636	OG0000001	Atha_AT3G29636.1|OG0000001	dicot-monocot	Flavonoids	At5Mat_NM_113880.2|Anthocyanins;AtACT_NM_125509.3|Aliphatic_amines;GmIF7MaT_NM_001250831.1|Flavonoids;GmIMaT1_KY399789.1|Flavonoids;GmIMaT3_KY399790.1|Flavonoids;GmMT7_EU192928.1|Flavonoids;MtMaT1_EU272030.1|Flavonoids;MtMaT2_EU272032.1|Flavonoids;MtMaT3_EU272031.1|Flavonoids
AT1G31490	AT1G31490		NA	NA		AT1G31490	OG0000038	Atha_AT1G31490.1|OG0000038	gymnosperms	NA	NA
AT1G65450	AT1G65450		NA	NA		AT1G65450	OG0000015	Atha_AT1G65450.1|OG0000015	gymnosperms	NA	NA
AT4G29250	AT4G29250		NA	NA		AT4G29250	OG0000043	Atha_AT4G29250.1|OG0000043	angiosperms	NA	NA
AT3G29680	AT3G29680		NA	NA		AT3G29680	OG0000001	Atha_AT3G29680.1|OG0000001	dicot-monocot	Flavonoids	At5Mat_NM_113880.2|Anthocyanins;AtACT_NM_125509.3|Aliphatic_amines;GmIF7MaT_NM_001250831.1|Flavonoids;GmIMaT1_KY399789.1|Flavonoids;GmIMaT3_KY399790.1|Flavonoids;GmMT7_EU192928.1|Flavonoids;MtMaT1_EU272030.1|Flavonoids;MtMaT2_EU272032.1|Flavonoids;MtMaT3_EU272031.1|Flavonoids
AT3G29720	AT3G29720		NA	NA		AT3G29720	OG0000001	Atha_AT3G29720.1|OG0000001	dicot-monocot	Flavonoids	At5Mat_NM_113880.2|Anthocyanins;AtACT_NM_125509.3|Aliphatic_amines;GmIF7MaT_NM_001250831.1|Flavonoids;GmIMaT1_KY399789.1|Flavonoids;GmIMaT3_KY399790.1|Flavonoids;GmMT7_EU192928.1|Flavonoids;MtMaT1_EU272030.1|Flavonoids;MtMaT2_EU272032.1|Flavonoids;MtMaT3_EU272031.1|Flavonoids
AT5G07860	AT5G07860		NA	NA		AT5G07860	OG0000004	Atha_AT5G07860.1|OG0000004	gymnosperms	NA	NA
AT2G25150	AT2G25150		NA	NA		AT2G25150	OG0000024	Atha_AT2G25150.1|OG0000024	dicots	Aliphatic_amines	AtSCT_BT009686.1|Aliphatic_amines
AT3G26040	AT3G26040		NA	NA		AT3G26040	OG0000013	Atha_AT3G26040.1|OG0000013	dicots	NA	NA
AT1G24430	AT1G24430		NA	NA		AT1G24430	OG0000005	Atha_AT1G24430.1|OG0000005	dicots	Alkaloids	RsACT_AJ556780|Alkaloids
AT3G62160	AT3G62160		NA	NA		AT3G62160	OG0000010	Atha_AT3G62160.1|OG0000010	gymnosperms	Aromatic_alcohols	BdPMT_HG421450.1_gen|NA;CcAT1_AXB26761.1|Flavonoids;CcAT2_AXB26762.1|Flavonoids;MsAAT_AX025506|Aromatic_alcohols,Aliphatic_alcohols,Terpenoids;OsPMT_XM_015765814.1|Aromatic_alcohols;ZmpCAT_BT042717.1|Aromatic_alcohols
AT5G07080	AT5G07080		NA	NA		AT5G07080	OG0000024	Atha_AT5G07080.1|OG0000024	dicots	Aliphatic_amines	AtSCT_BT009686.1|Aliphatic_amines
