# Supplementary material for: Phylogenomic analyses across land plants reveals motifs and coexpression patterns useful for functional prediction in the BAHD acyltransferase family
Source: Front Plant Sci. 2023 Feb 10;14:1067613. doi: 10.3389/fpls.2023.1067613 (PMC9950517; doi:10.3389/fpls.2023.1067613)
Supplement: Supplementary File 3 — Excel file providing links to the used genome sequence repositories. [file Table_3.xlsx]

## Sheet: Genome repositories
Species	Link to repository	Last accessed
Amborella trichopoda	https://phytozome-next.jgi.doe.gov/info/Atrichopoda_v1_0	2023-01-16
Anthoceros agrestis	https://www.hornworts.uzh.ch/en/hornwort-genomes.html	2023-01-16
Anthoceros punctatus	https://www.hornworts.uzh.ch/en/hornwort-genomes.html	2023-01-16
Aquilegia coerulea	https://phytozome-next.jgi.doe.gov/info/Acoerulea_v3_1	2023-01-16
Arabidopsis thaliana	https://www.arabidopsis.org/download/index-auto.jsp?dir=%2Fdownload_files%2FProteins%2FTAIR10_protein_lists	2023-01-16
Azolla filiculoides	https://fernbase.org/	2023-01-16
Bathycoccus prasinos	https://www.ncbi.nlm.nih.gov/genome/?term=txid41875[Organism:noexp]	2023-01-16
Beta vulgaris	https://phytozome-next.jgi.doe.gov/info/Bvulgaris_EL10_1_0	2023-01-16
Brachypodium distachyon	https://phytozome-next.jgi.doe.gov/info/Bdistachyon_v3_1	2023-01-16
Brassica oleracea	https://phytozome-next.jgi.doe.gov/info/Boleraceacapitata_v1_0	2023-01-16
Carica papaya	https://www.plantgdb.org/CpGDB/	2023-01-16
Chara braunii	https://plants.ensembl.org/Chara_braunii/Info/Index	2023-01-16
Chlorella spec. (NC64A)	https://mycocosm.jgi.doe.gov/ChlNC64A_1/ChlNC64A_1.home.html	2023-01-16
Citrus sinensis	https://phytozome-next.jgi.doe.gov/info/Csinensis_v1_1	2023-01-16
Clamydomonas reinhartii	https://www.ncbi.nlm.nih.gov/assembly/GCF_000002595.1/	2023-01-16
Coccomyxa sp.C-169	https://mycocosm.jgi.doe.gov/Coc_C169_1/Coc_C169_1.home.html	2023-01-16
Cyanidioschyzon merolae	https://plants.ensembl.org/Cyanidioschyzon_merolae/Info/Index	2023-01-16
Daucus carota	https://phytozome-next.jgi.doe.gov/info/Dcarota_v2_0	2023-01-16
Dunaliella salina	https://phytozome-next.jgi.doe.gov/info/Dsalina_v1_0	2023-01-16
Eucalyptus grandis	https://phytozome-next.jgi.doe.gov/info/Egrandis_v2_0	2023-01-16
Galdieria sulphuraria	https://plants.ensembl.org/Galdieria_sulphuraria/Info/Index	2023-01-16
Glycine max	http://plants.ensembl.org/Glycine_max/Info/Index	2023-01-16
Gossypium raimondii	https://phytozome-next.jgi.doe.gov/info/Graimondii_v2_1	2023-01-16
Ipomoea nil	http://viewer.shigen.info/asagao/download.php	2023-01-16
Klebsormidium nitens	http://www.plantmorphogenesis.bio.titech.ac.jp/~algae_genome_project/klebsormidium/	2023-01-16
Malus domestica	https://plants.ensembl.org/Malus_domestica_golden/Info/Index	2023-01-16
Manihot esculenta	https://phytozome-next.jgi.doe.gov/info/Mesculenta_v8_1	2023-01-16
Marchantia polymorpha	https://marchantia.info/download/v31/	2023-01-16
Medicago truncatula	https://plants.ensembl.org/Medicago_truncatula/Info/Index	2023-01-16
Micromonas pusilla	https://phytozome-next.jgi.doe.gov/info/MpusillaCCMP1545_v3_0	2023-01-16
Mimulus guttatus	https://phytozome-next.jgi.doe.gov/info/Mguttatus_v2_0	2023-01-16
Musa acuminata	https://banana-genome-hub.southgreen.fr/content/download	2023-01-16
Oryza sativa	https://phytozome-next.jgi.doe.gov/info/Osativa_v7_0	2023-01-16
Ostreococcus lucimarinus	https://phytozome-next.jgi.doe.gov/info/Olucimarinus_v2_0	2023-01-16
Ostreococcus tauri	https://www.ncbi.nlm.nih.gov/genome/?term=txid70448[Organism:noexp]	2023-01-16
Petunia axillaris	https://solgenomics.net/organism/Petunia_axillaris/genome	2023-01-16
Physcomitrella (Physcomitrium) patens	https://phytozome-next.jgi.doe.gov/info/Ppatens_v3_3	2023-01-16
Pinus abies	https://www.ncbi.nlm.nih.gov/genome/?term=txid3329[Organism:noexp]	2023-01-16
Pinus taeda	https://www.ncbi.nlm.nih.gov/assembly/GCA_000404065.2	2023-01-16
Pleurozium schreberi	https://github.com/PycnopodiaD/Pleurozium_schreberi_annotated_genome_files	2023-01-16
Populus trichocarpa	https://phytozome-next.jgi.doe.gov/info/Ptrichocarpa_v3_1	2023-01-16
Porphyridium purpureum	https://www.ncbi.nlm.nih.gov/genome/?term=Porphyridium+purpureum	2023-01-16
Prunus persica	http://plants.ensembl.org/Prunus_persica/Info/Index	2023-01-16
Ricinus communis	https://www.ncbi.nlm.nih.gov/genome/?term=txid3988[orgn]	2023-01-16
Salvinia cuculla	https://www.fernbase.org/	2023-01-16
Selaginella moellendorffii	https://phytozome-next.jgi.doe.gov/info/Smoellendorffii_v1_0	2023-01-16
Sequoiadendron giganteum	https://treegenesdb.org/FTP/Genomes/Segi/	2023-01-16
Setaria italica	https://phytozome-next.jgi.doe.gov/info/Sitalica_v2_2	2023-01-16
Solanum lycopersicum	https://solgenomics.net/ftp/tomato_genome/Heinz1706/annotation/ITAG3.2_release/	2023-01-16
Sorghum bicolor	https://phytozome-next.jgi.doe.gov/info/Sbicolor_v3_1_1	2023-01-16
Sphagnum fallax	https://phytozome-next.jgi.doe.gov/info/Sfallax_v0_5	2023-01-16
Vitis vinifera	https://phytozome-next.jgi.doe.gov/info/Vvinifera_v2_1	2023-01-16
Volvox carteri	https://phytozome-next.jgi.doe.gov/info/Vcarteri_v2_1	2023-01-16
Zea mays	https://phytozome-next.jgi.doe.gov/info/ZmaysPHJ40_v1_1	2023-01-16
